# Supplementary material
Source: PubMed Central journal article supplement (PMC6309643)
Supplement: NIHMS1504419-supplement-3.pdf [file NIHMS1504419-supplement-3.pdf]

Figure S3. Association of urine ACR strata with (a) allograft failure, (b) cardiovascular disease events, (c) all-cause mortality, and (d) the composite of allograft failure and all-cause mortality, based on multivariable-adjusted models, presented for key subgroups. The X-axis is the adjusted hazard ratio and has been log-transformed. The solid vertical line indicates a hazard ratio of 1.00. The p-value for interactions appears between the hazard ratio groups to which it refers.

(a)

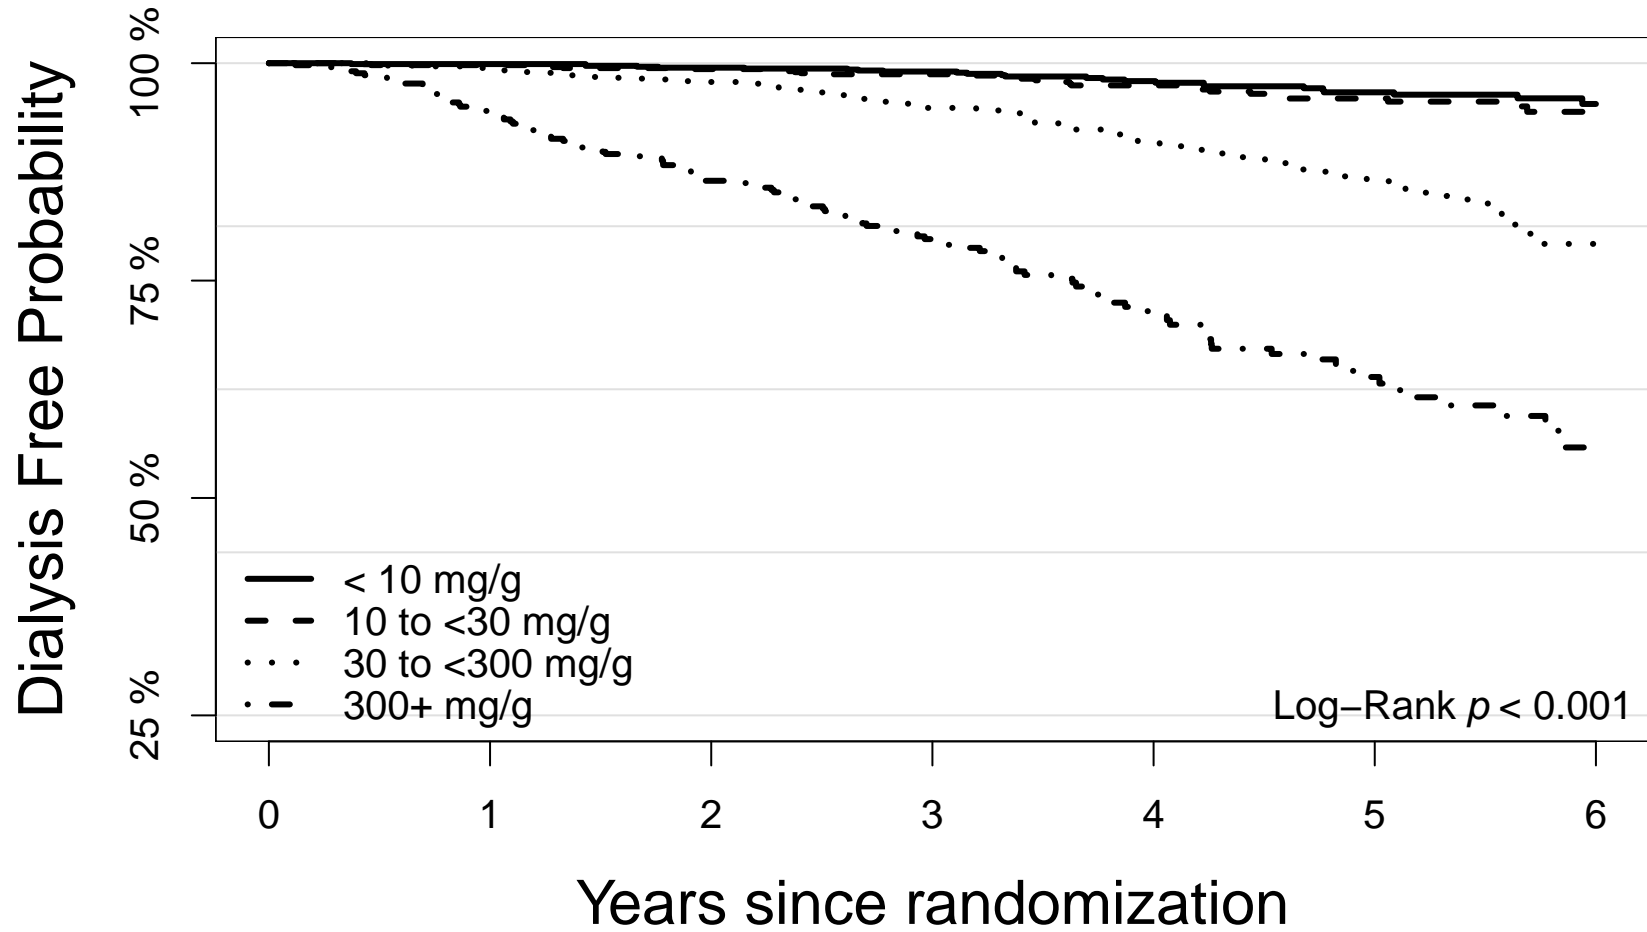

| Patients at risk |      |      |     |     |     |     |     |
|------------------|------|------|-----|-----|-----|-----|-----|
|                  | 0    | 1    | 2   | 3   | 4   | 5   | 6   |
| < 10 mg/g        | 1017 | 984  | 944 | 802 | 518 | 372 | 128 |
| 10 to <30 mg/g   | 912  | 886  | 848 | 702 | 427 | 279 | 103 |
| 30 to <300 mg/g  | 1134 | 1068 | 999 | 778 | 463 | 295 | 78  |
| 300+ mg/g        | 448  | 387  | 335 | 249 | 140 | 86  | 21  |

(b)

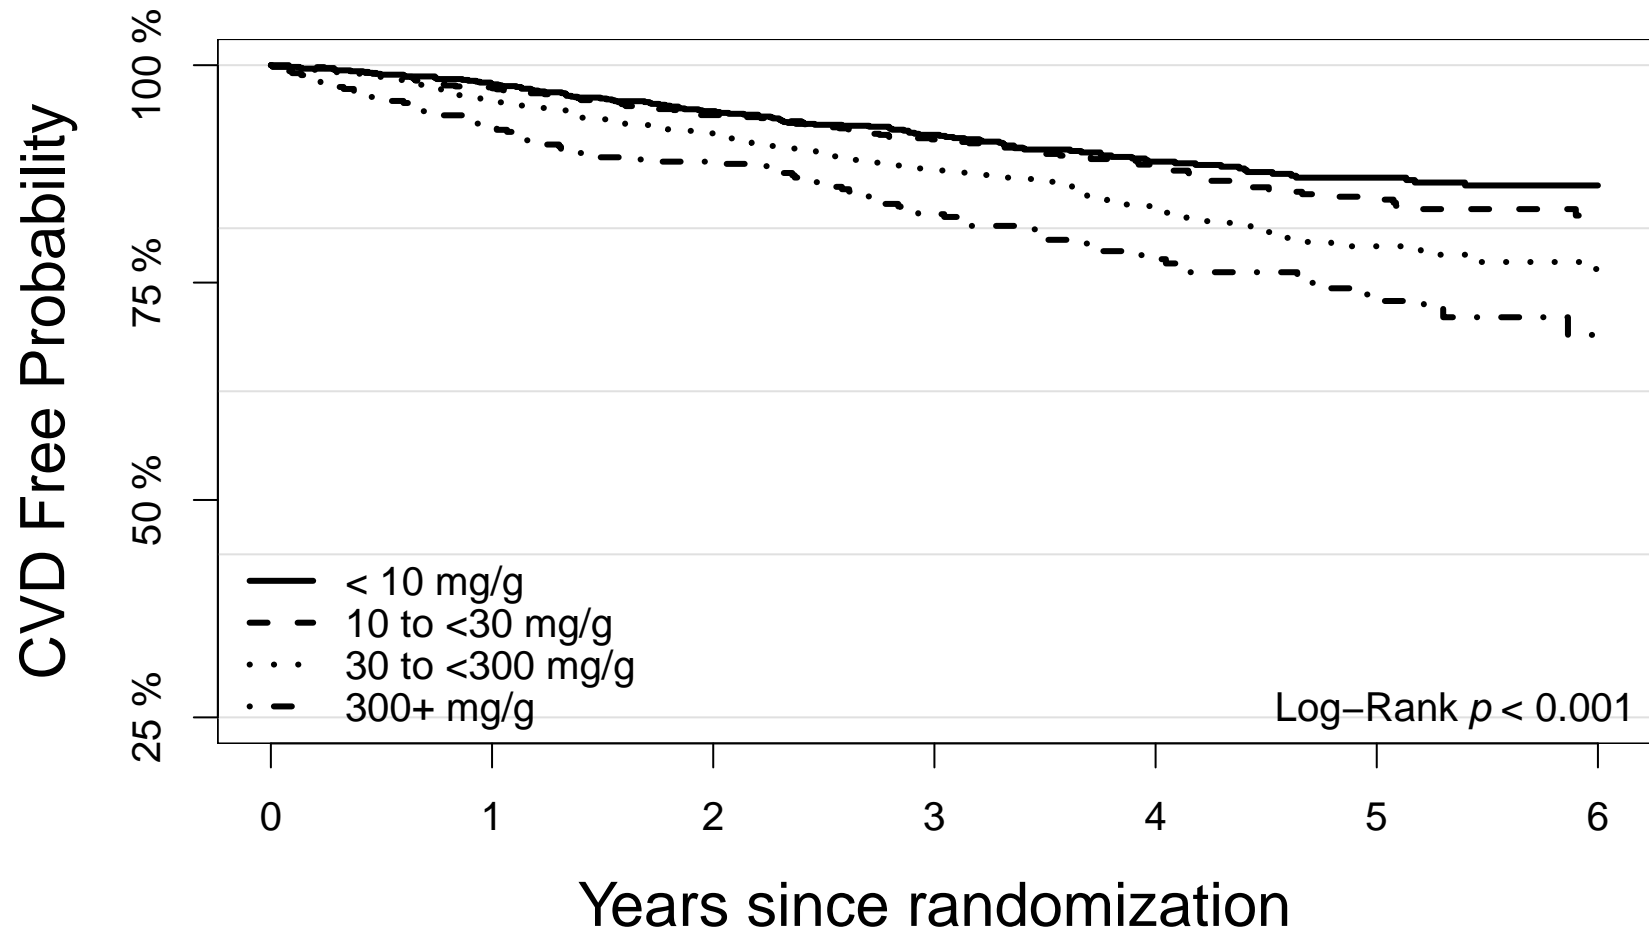

| Patients at risk |      |      |     |     |     |     |     |
|------------------|------|------|-----|-----|-----|-----|-----|
|                  | 0    | 1    | 2   | 3   | 4   | 5   | 6   |
| < 10 mg/g        | 1017 | 966  | 908 | 755 | 483 | 346 | 118 |
| 10 to <30 mg/g   | 912  | 870  | 815 | 656 | 391 | 252 | 92  |
| 30 to <300 mg/g  | 1134 | 1043 | 957 | 745 | 446 | 288 | 85  |
| 300+ mg/g        | 448  | 389  | 349 | 266 | 161 | 99  | 26  |

(c)

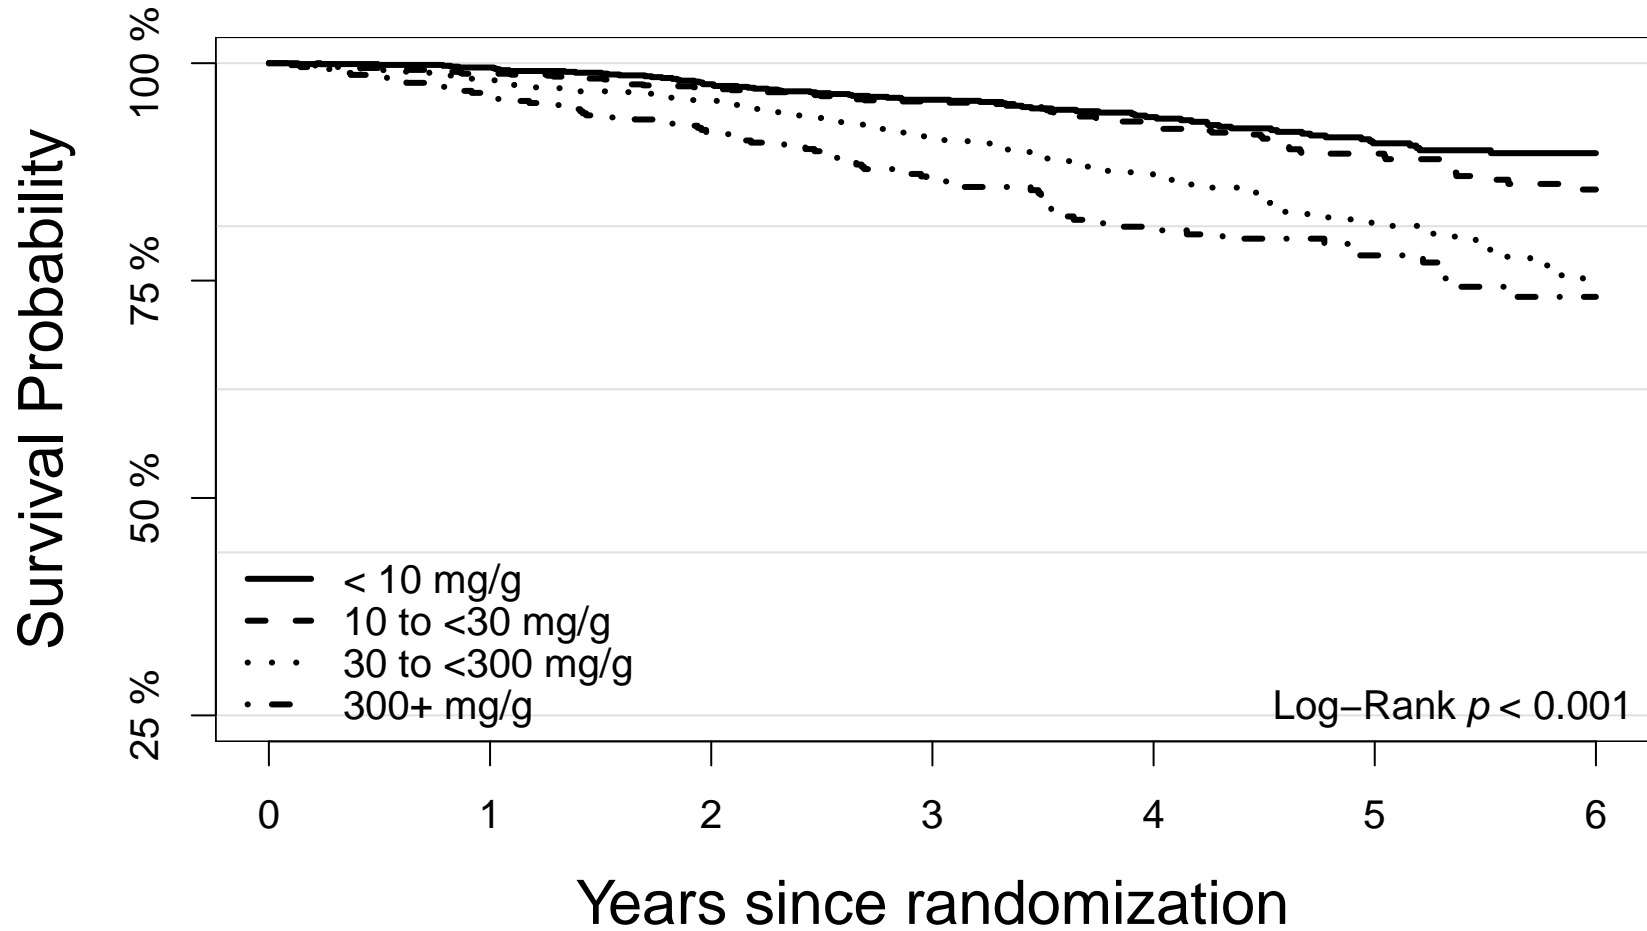

| Patients at risk  |      |      |      |     |     |     |     |
|-------------------|------|------|------|-----|-----|-----|-----|
|                   | 0    | 1    | 2    | 3   | 4   | 5   | 6   |
| $< 10$ mg/g       | 1017 | 996  | 958  | 816 | 534 | 387 | 133 |
| 10 to $<30$ mg/g  | 912  | 895  | 861  | 712 | 446 | 290 | 109 |
| 30 to $<300$ mg/g | 1134 | 1086 | 1039 | 825 | 505 | 327 | 97  |
| 300+ mg/g         | 448  | 415  | 380  | 299 | 186 | 114 | 31  |

(d)

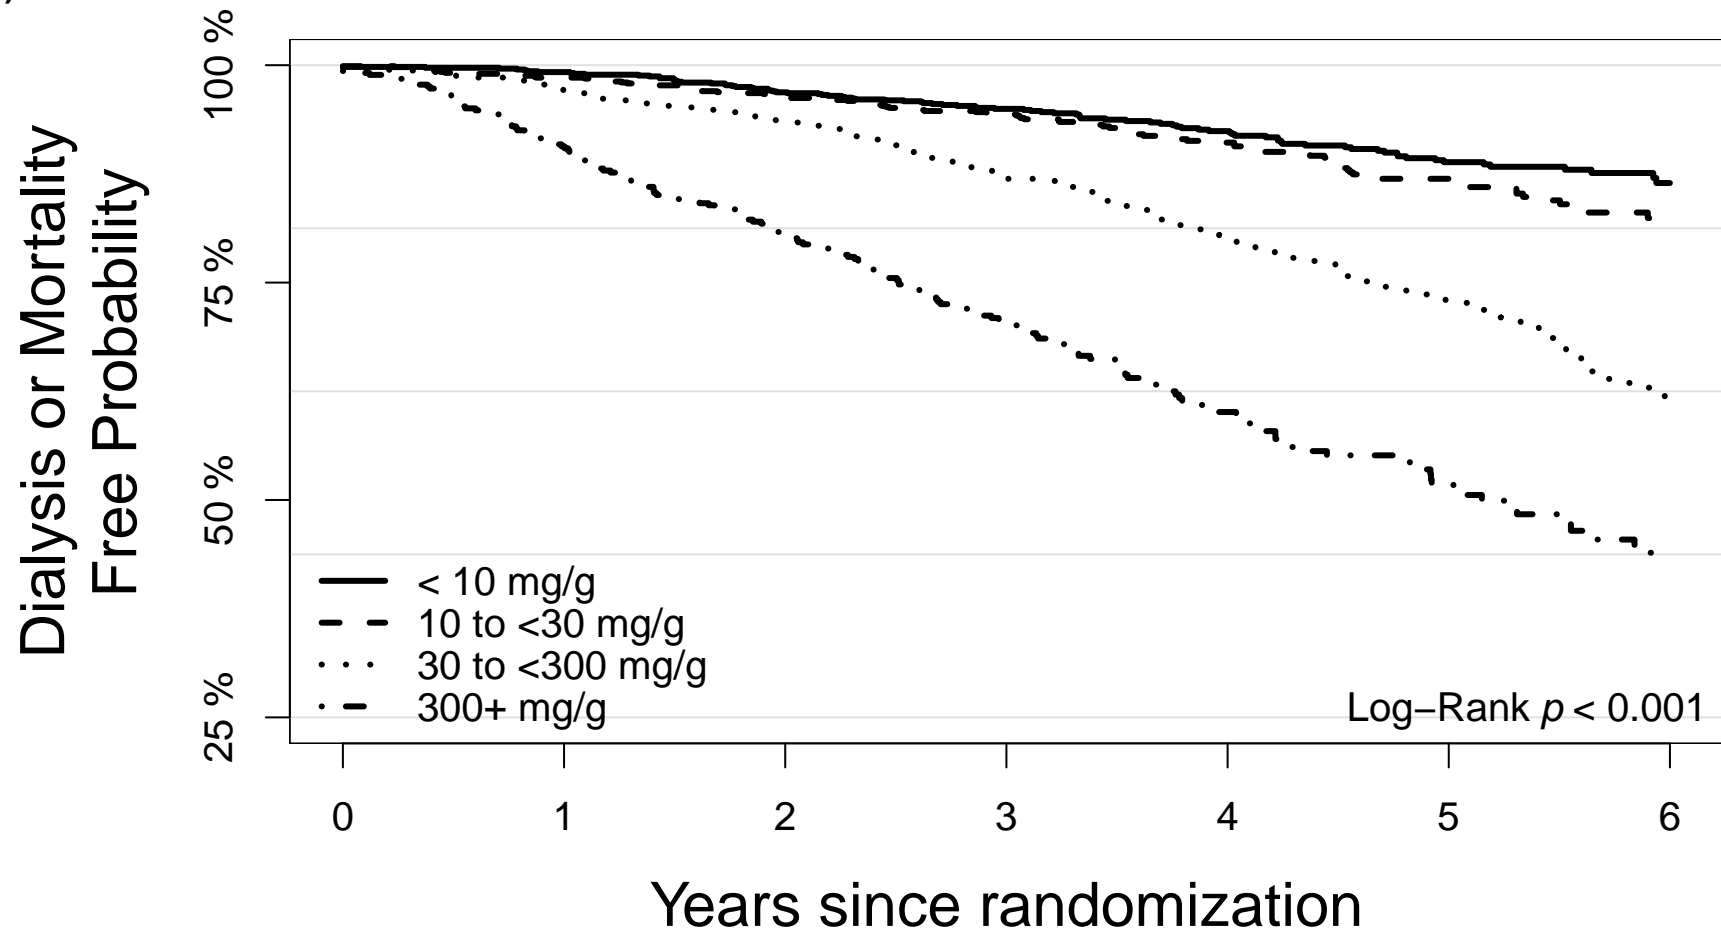

| Patients at risk |      |      |      |     |     |     |     |
|------------------|------|------|------|-----|-----|-----|-----|
|                  | 0    | 1    | 2    | 3   | 4   | 5   | 6   |
| < 10 mg/g        | 1017 | 993  | 951  | 810 | 526 | 378 | 127 |
| 10 to <30 mg/g   | 912  | 893  | 855  | 707 | 437 | 283 | 106 |
| 30 to <300 mg/g  | 1134 | 1075 | 1017 | 792 | 472 | 298 | 81  |
| 300+ mg/g        | 448  | 393  | 338  | 252 | 142 | 87  | 21  |
