# Supplementary material
Source: PubMed Central journal article supplement (PMC6309643)
Supplement: NIHMS1504419-supplement-4.pdf [file NIHMS1504419-supplement-4.pdf]

Table S1. Baseline characteristics of participants included and excluded

| Characteristics              | Total<br>(N = 4110) | Excluded<br>(n=599, 14.6%) | Included<br>(n=3511, 85.4%) | p      |
|------------------------------|---------------------|----------------------------|-----------------------------|--------|
| <b>Age (years)</b>           | 51.9 ± 9.4          | 52.8 ± 9.7                 | 51.8 ± 9.4                  | 0.01   |
| <b>Women</b>                 | 1528 (37%)          | 219 (37%)                  | 1309 (37%)                  | 0.7    |
| <b>Race</b>                  |                     |                            |                             |        |
| White                        | 3084 (76%)          | 405 (71%)                  | 2679 (76%)                  | 0.02   |
| Black                        | 728 (18%)           | 119 (21%)                  | 609 (17%)                   |        |
| Other                        | 270 (7%)            | 47 (8%)                    | 223 (6%)                    |        |
| <b>Treatment group</b>       |                     |                            |                             |        |
| High dose vitamin            | 2056 (50%)          | 301 (50%)                  | 1755 (50%)                  | 0.9    |
| Low dose vitamin             | 2054 (50%)          | 298 (50%)                  | 1756 (50%)                  |        |
| <b>Location</b>              |                     |                            |                             |        |
| United States                | 3000 (73%)          | 492 (82%)                  | 2508 (71%)                  | <0.001 |
| Canada                       | 498 (12%)           | 104 (17%)                  | 394 (11%)                   |        |
| Brazil                       | 612 (15%)           | 3 (1%)                     | 609 (17%)                   |        |
| <b>Graft vintage (years)</b> | 4.0 (1.7, 7.5)      | 3.8 (1.7, 7.9)             | 4.1 (1.7, 7.4)              | 0.7    |
| <b>Living donor kidney</b>   | 1705 (42%)          | 208 (37%)                  | 1497 (43%)                  | 0.01   |
| <b>Medications</b>           |                     |                            |                             |        |
| Cyclosporine                 | 2094 (51%)          | 320 (54%)                  | 1774 (51%)                  | 0.2    |
| Tacrolimus                   | 1555 (38%)          | 221 (37%)                  | 1334 (38%)                  | 0.7    |
| Any CNI                      | 3640 (89%)          | 539 (90%)                  | 3101 (88%)                  | 0.1    |
| Sirolimus                    | 345 (8%)            | 52 (9%)                    | 293 (8%)                    | 0.7    |
| ACEi/ARB                     | 1824 (44%)          | 267 (45%)                  | 1557 (44%)                  | 0.8    |
| Statin                       | 2156 (53%)          | 323 (54%)                  | 1833 (52%)                  | 0.4    |
| Aspirin                      | 1694 (41%)          | 234 (39%)                  | 1460 (42%)                  | 0.3    |
| <b>Medical History</b>       |                     |                            |                             |        |
| Cardiovascular Disease       | 820 (20%)           | 117 (20%)                  | 703 (20%)                   | 0.9    |
| Diabetes Mellitus            | 1663 (41%)          | 260 (44%)                  | 1403 (40%)                  | 0.07   |
| Hypertension                 | 3778 (92%)          | 550 (92%)                  | 3228 (92%)                  | 0.7    |
| <b>Smoking</b>               |                     |                            |                             |        |
| Never                        | 2001 (49%)          | 298 (54%)                  | 1703 (49%)                  | 0.02   |
| Former                       | 1611 (40%)          | 189 (34%)                  | 1422 (41%)                  |        |
| Current                      | 451 (11%)           | 65 (12%)                   | 386 (11%)                   |        |
| <b>Examination Findings</b>  |                     |                            |                             |        |
| Systolic BP (mm Hg)          | 136.0 ± 19.7        | 135.2 ± 18.9               | 136.2 ± 19.8                | 0.4    |
| Diastolic BP (mm Hg)         | 78.5 ± 12.1         | 76.2 ± 10.3                | 78.8 ± 12.4                 | <0.001 |
| BMI (kg/m <sup>2</sup> )     | 29.2 ± 6.2          | 29.2 ± 6.6                 | 29.2 ± 6.2                  | 0.7    |
| <b>Laboratory Results</b>    |                     |                            |                             |        |
| Total cholesterol            | 184.6 ± 44.0        | 180.7 ± 42.4               | 185.0 ± 44.2                | 0.01   |
| HDL cholesterol              | 46.2 ± 13.9         | 46.2 ± 13.9                | 46.2 ± 13.9                 | 0.8    |
| LDL cholesterol              | 101.0 ± 34.4        | 97.7 ± 32.9                | 101.3 ± 34.6                | 0.04   |
| Triglycerides                | 164 (113, 238)      | 160 (112, 240)             | 164 (113, 238)              | 0.9    |
| Serum creatinine             | 1.7 ± 0.6           | 1.7 ± 0.6                  | 1.7 ± 0.6                   | 0.3    |
| eGFR                         | 48.9 ± 17.7         | 48.5 ± 19.0                | 48.9 ± 17.5                 | 0.3    |

|            |                   |                    |                  |       |
|------------|-------------------|--------------------|------------------|-------|
| ACR (mg/g) | 25.0 (8.7, 102.1) | 36.2 (11.7, 133.3) | 24.1 (8.5, 97.8) | 0.001 |
|------------|-------------------|--------------------|------------------|-------|

Results are mean  $\pm$  standard deviation, median (25<sup>th</sup> to 75<sup>th</sup> percentile) or n (%). ACR, albumin to creatinine ratio; ACEi, angiotensin converting enzyme inhibitor; ARB, angiotensin receptor blocker; BP, blood pressure; BMI, body mass index; HDL, high density lipoprotein; LDL, low density lipoprotein. Cholesterol and serum creatinine values are in mg/dl. eGFR, estimated glomerular filtration rate in ml/min/1.73m<sup>2</sup>.
